# Supplementary material for: Rapamycin–PLGA microparticles prevent senescence, sustain cartilage matrix production under stress and exhibit prolonged retention in mouse joints
Source: Royal Society of Chemistry journal article supplement (doi:10.1039/d0bm00596g), 2020-01-01
Supplement: d0bm00596g1.pdf [file d0bm00596g1.pdf]

# **Rapamycin-PLGA microparticles prevent senescence, sustain cartilage matrix production under stress and exhibit prolonged retention in mice joints**

Kaamini M. Dhanabalan<sup>1</sup>, Vishal K. Gupta<sup>1</sup>, Rachit Agarwal<sup>1\*</sup>

<sup>1</sup>*Centre for BioSystems Science and Engineering, Indian Institute of Science, Bengaluru, India 560012.*

\*Corresponding author's email: rachit@iisc.ac.in

## **Supplementary information**

### **Supplementary Note 1: Curve fitting on rapamycin release profile from PLGA MPs**

We observed a bi-phasic release of rapamycin from all PLGA MPs (**Figure 1d**) which is in accordance to the previously published literature.<sup>49-51</sup> Release profiles from different molecular weight PLGA particles were fitted using non-linear regression (least square method) two-phase exponential decay curve (**Supplementary Figure S1**). The maximum y-value (Y0) and minimum y-value (plateau) were constrained to 100 and 0 respectively. The two-phase exponential decay pattern observed in all of the PLGA MPs can be attributed to their initial burst release represented by fast exponential decay and the second phase of drug release which is slower and sustained for several days due to slower degradation of polymer chain represented by slow exponential decay. The  $t_{1/2}$  values for slower exponential decay ( $t_{1/2}$  slow) corresponded well to the molecular weights of PLGA with higher molecular weight PLGA exhibiting longer half-lives (**Supplementary Table S2**).

### Curve fitting for rapamycin release profiles

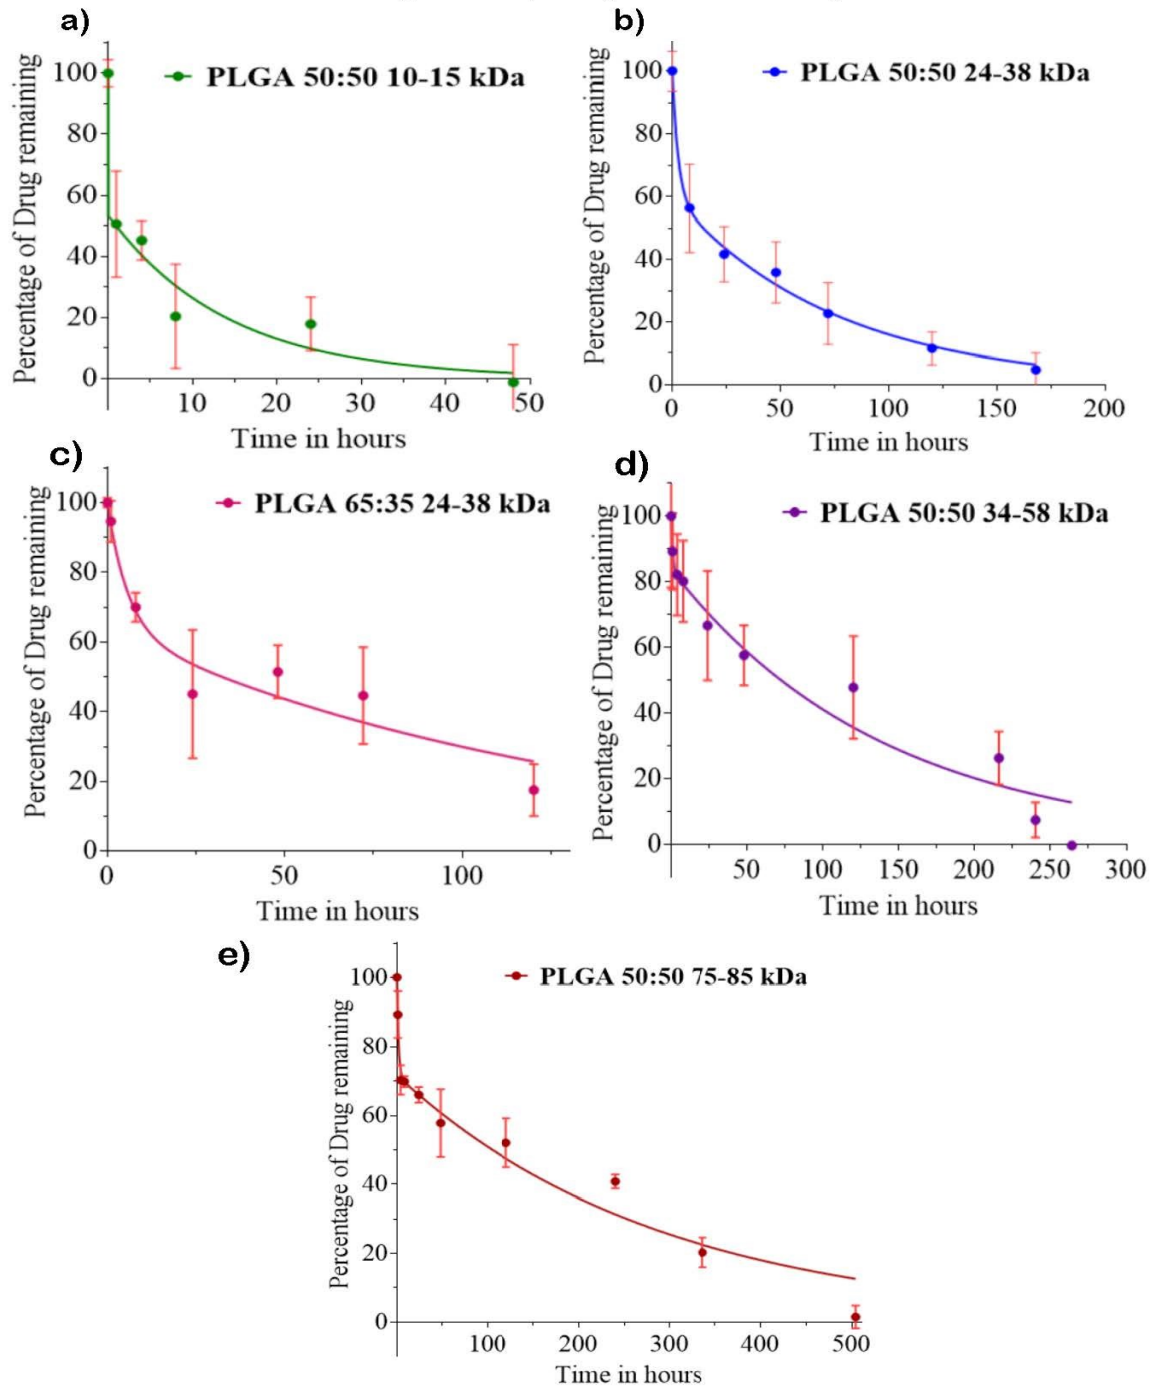

**Figure S1: Curve fitting for rapamycin release from different molecular weights PLGA:** Quantification of *in vitro* release profiles of rapamycin from PLGA particles synthesized from (a) PLGA 10-15 kDa (50:50) (b) PLGA 24-38 kDa (50:50) (c) PLGA 24-38 kDa (65:35) (d) PLGA 34-58 kDa (50:50) and (e) PLGA 75-85 kDa (50:50). Release profiles from different molecular weight PLGA particles were fitted using non-linear regression (least square method) two-phase exponential decay curve. Data in graphs represent the mean  $\pm$  s.d. (n = 3).

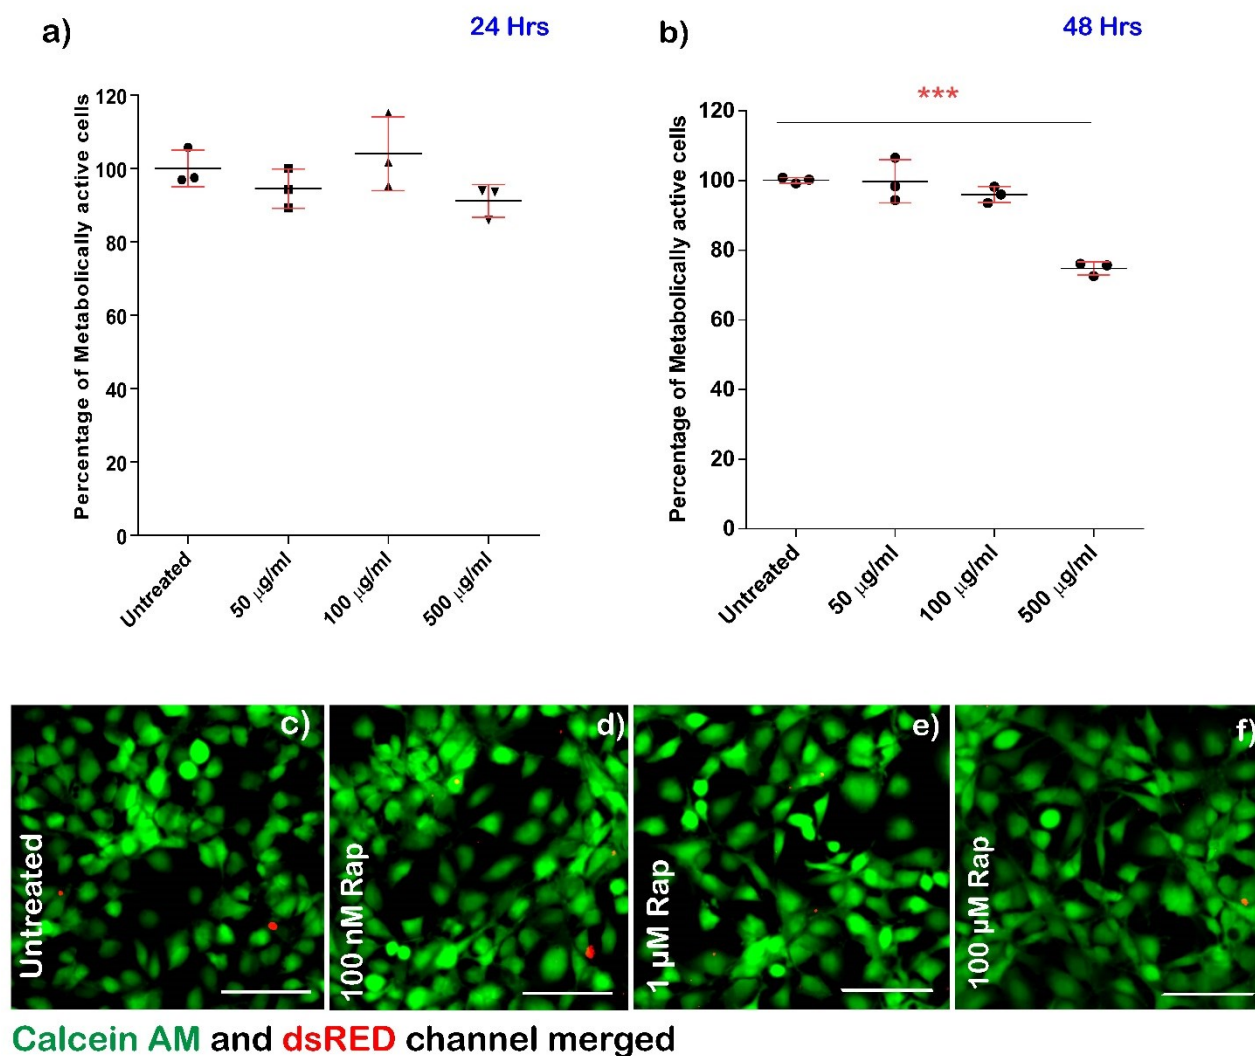

**Figure S2: Cytocompatibility assays for PLGA MPs and rapamycin.** Metabolic activity of chondrocytes treated with varying concentration of PLGA MPs for (a) 24 h and (b) 48 h. Images of Calcein AM (green) and Propidium Iodide (red) stained C28/I2 cells treated with (c) 0 nM, (d) 10 nM, (e) 1  $\mu\text{M}$  and (f) 100  $\mu\text{M}$  of Rapamycin. Scale bar 30  $\mu\text{m}$ . \*\*\* $p < 0.001$  for 500  $\mu\text{g/mL}$  PLGA MPs versus all other groups.  $p$ -value  $< 0.05$  were considered significant. Data in graphs represent the mean  $\pm$  s.d. ( $n = 3$ ) and  $p$  values were determined by One-way analysis of variance (ANOVA) and Tukey's post hoc tests using GraphPad prism Software.

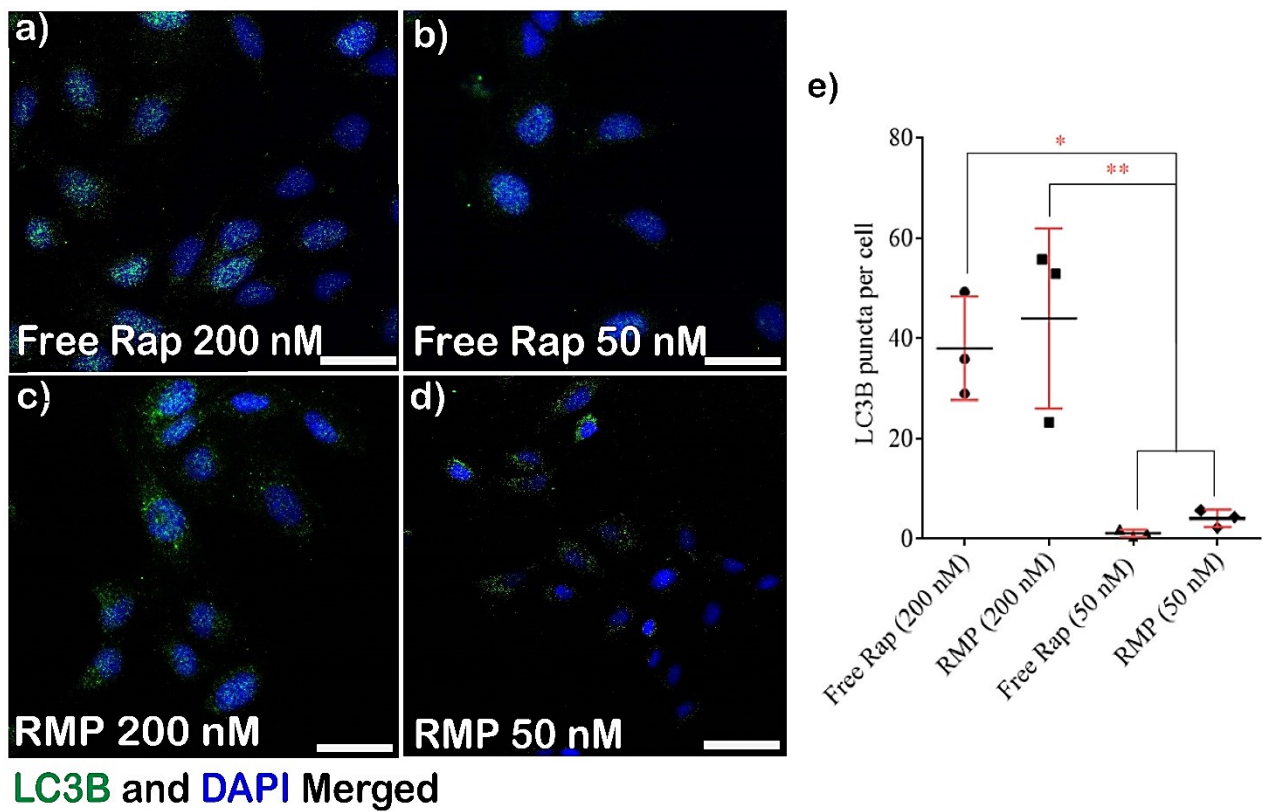

**Figure S3: Rapamycin MPs induces autophagy in chondrocytes.** Fluorescence microscopy images of C28/I2 cells stained with DAPI (blue) and LC3B (green) primary antibody after treatment with (a) free rapamycin 200 nM, (b) free rapamycin 50 nM (c) RMP (200 nM rapamycin) (d) RMP (50 nM rapamycin). (e) Quantification of LC3B puncta per cell using ImageJ software (n=3 per group). Data in graphs represent the mean  $\pm$  s.d. and  $p$  values were determined One-way analysis of variance (ANOVA) test and Tukey's post hoc tests using GraphPad Prism Software. \* represent  $p < 0.05$  and \*\*represent  $p < 0.007$  Scale bar 20  $\mu\text{m}$ .

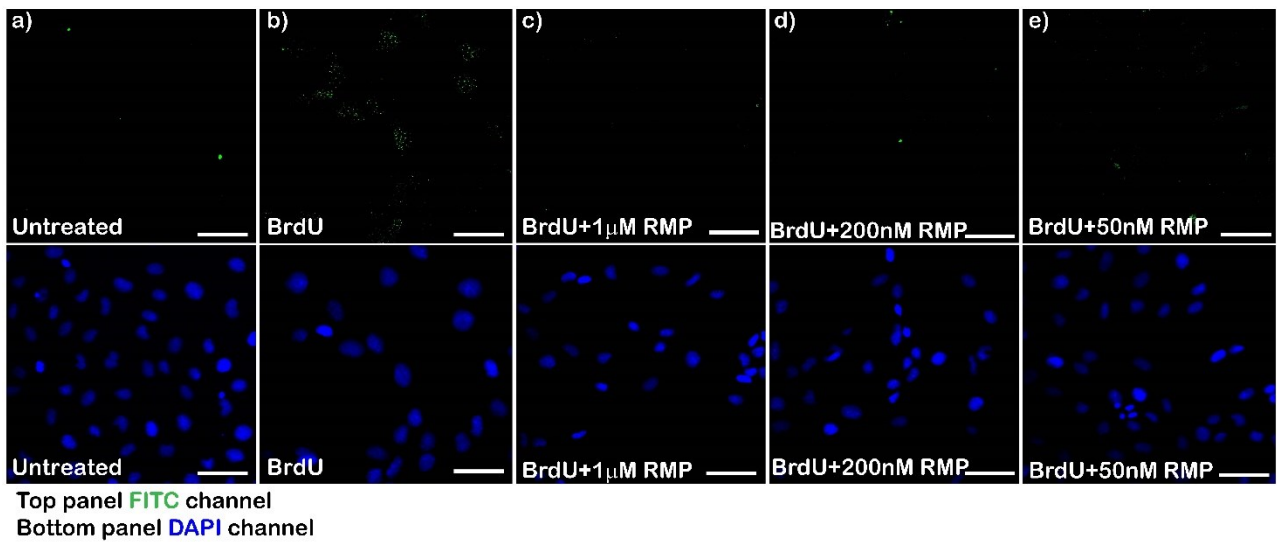

**Figure S4: Rapamycin MPs reduces DNA damage in chondrocytes under genotoxic stress.**

Fluorescence microscopy images of C28/I2 cells stained with DAPI (blue) and  $\gamma$ H2Ax (green) primary antibody after treatment with (a) no treatment, (b) BrdU (200  $\mu$ M) treated, (c) BrdU (200  $\mu$ M) along with Rapamycin MPs (1  $\mu$ M), (d) BrdU (200  $\mu$ M) along with Rapamycin MPs (200 nM) and (e) BrdU (200  $\mu$ M) along with Rapamycin MPs (50 nM). Top Panel – FITC channel, Bottom panel – same field in DAPI channel. Scale bar 20  $\mu$ m.

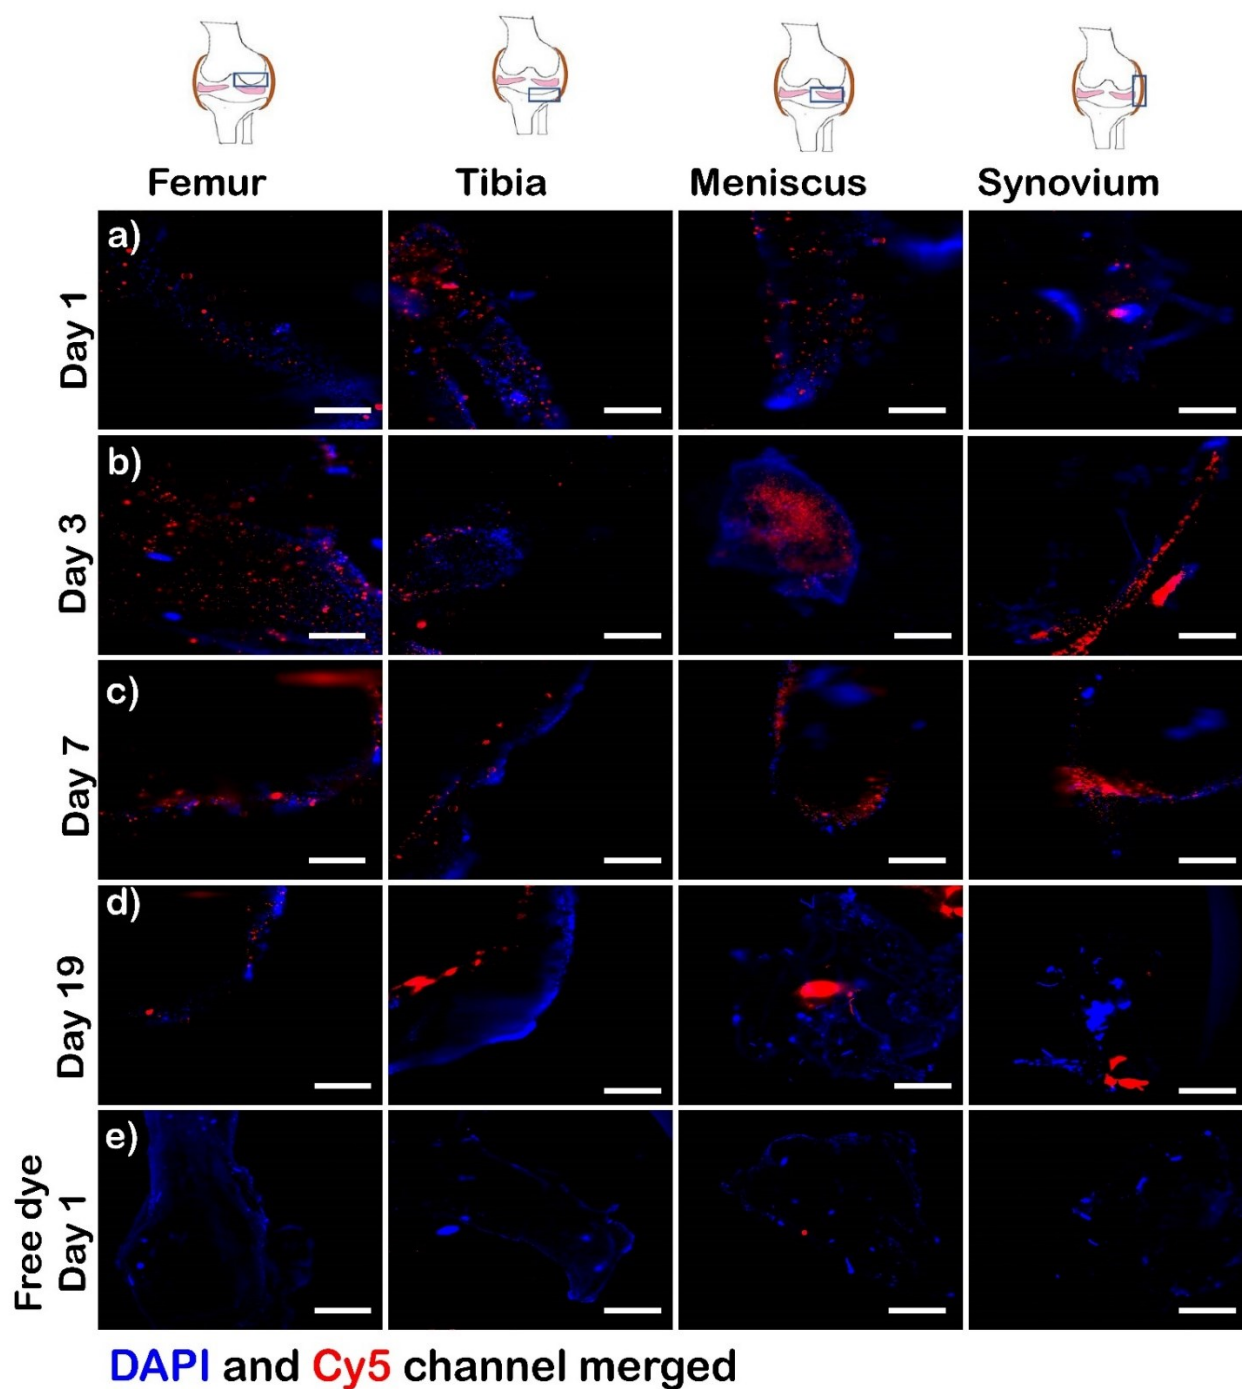

**Figure S5: Cy5 labeled PLGA MPs of high molecular weight exhibit localisation to various tissues in mice knee joints.** Fluorescence microscopy images of dissected mice joint tissues stained with DAPI and imaged at (a) 1 day, (b) 3 days, (c) 7 days and (d) 19 days after intra-articular injection of Cy5 labeled PLGA MPs. (e) Imaging was performed at Day 1 after injection of free Cy5 dye. Topmost insets depict the area of the joint that was imaged. **DAPI**-cells on the joint surface, **Cy5**-PLGA MPs encapsulating Cy5. Scale bar 100 μm.

Table S1: PLGA microparticles of different molecular weights and their respective sizes along with their encapsulation efficiency

| <b>Molecular weight of<br/>PLGA<br/>(Ratio of PLA: PGA)</b> | <b>Size measured by DLS [nm]</b> | <b>Rapamycin<br/>encapsulation efficiency<br/>[%]</b> |
|-------------------------------------------------------------|----------------------------------|-------------------------------------------------------|
| 10 kDa - 14 kDa (50:50)                                     | 1021 ± 153                       | 63.43 ± 1.326                                         |
| 24 kDa - 38 kDa (50:50)                                     | 1066 ± 174.9                     | 48.91 ± 0.930                                         |
| 24 kDa - 38 kDa (65:35)                                     | 946 ± 155.9                      | 41.42 ± 1.326                                         |
| 34 kDa - 54 kDa (50:50)                                     | 1070 ± 183.1                     | 41.33 ± 8.040                                         |
| 75 kDa - 85 kDa (50:50)                                     | 1039 ± 188                       | 32.6 ± 3.007                                          |

Table S2: Two-phase exponential decay curve parameters for rapamycin release from PLGA microparticles of different molecular weights

| <b>Molecular weight of PLGA<br/>(Ratio of PLA: PGA)</b> | <b>Correlation<br/>co-efficient<br/>(R<sup>2</sup>)</b> | <b>Equation</b>                                         | <b>t<sub>1/2</sub><br/>(Slow)<br/>hours</b> |
|---------------------------------------------------------|---------------------------------------------------------|---------------------------------------------------------|---------------------------------------------|
| 10 kDa - 14 kDa (50:50)                                 | 0.8855                                                  | $y = 46.5 e^{-8.586 \cdot 10^7 x} + 53.5 e^{-0.0705 x}$ | 9.83                                        |
| 24 kDa - 38 kDa (50:50)                                 | 0.9396                                                  | $y = 39.75 e^{-0.3676 x} + 60.25 e^{-0.0132 x}$         | 52.49                                       |
| 24 kDa - 38 kDa (65:35)                                 | 0.8739                                                  | $y = 36.34 e^{-0.1749 x} + 46617 e^{-0.0075 x}$         | 91.79                                       |
| 34 kDa - 54 kDa (50:50)                                 | 0.8707                                                  | $y = 16.19 e^{-0.9766 x} + 83.81 e^{-0.0071 x}$         | 97.31                                       |
| 75 kDa - 85 kDa (50:50)                                 | 0.9474                                                  | $y = 28.21 e^{-0.5847 x} + 19427 e^{-0.0034 x}$         | 201.5                                       |
